# Supplementary material for: Cubic Pm3n supermicroporous silicas and aluminosilicates templated by short-chain alkyltrimethylammonium surfactants
Source: Royal Society of Chemistry journal article supplement (doi:10.1039/c4ta02269f), 2014-01-01
Supplement: c4ta02269f1.pdf [file c4ta02269f1.pdf]

## Supplementary Information

### **Cubic $Pm3n$ Supermicroporous Silicas and Aluminosilicates Templated by Short Chain Alkyltrimethylammonium Surfactants**

Wen Hua Fu, Sai Jin Wu, Yi Meng Wang \*, Ming Yuan He

*Shanghai Key Lab of Green Chemistry and Chemical Processes, Department of  
Chemistry, East China Normal University, Shanghai 200062, PR China; Tel: 0086-  
21-62232251; fax: 0086-21-62232251; E-mail: ymwang@chem.ecnu.edu.cn*

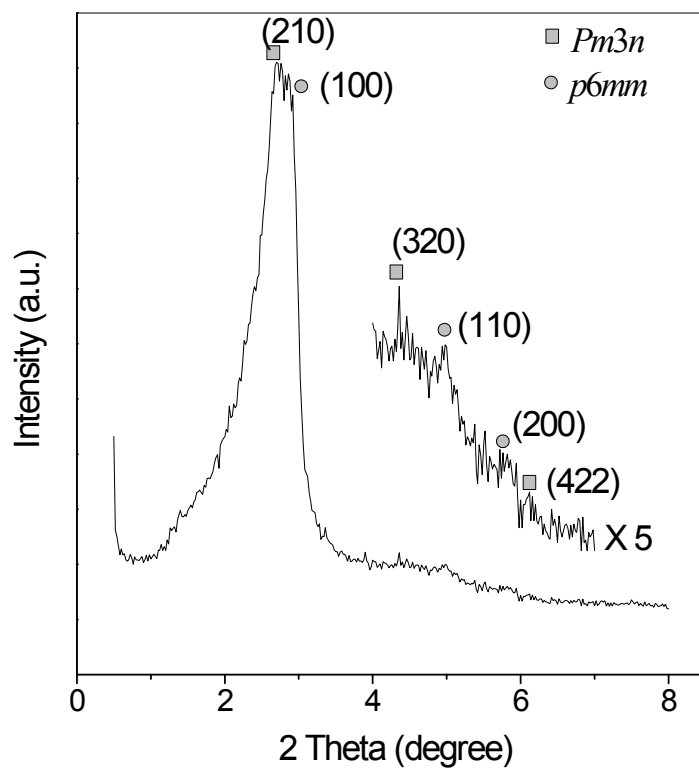

**Figure S1** XRD pattern of as-made S-C<sub>12</sub>-HCl.

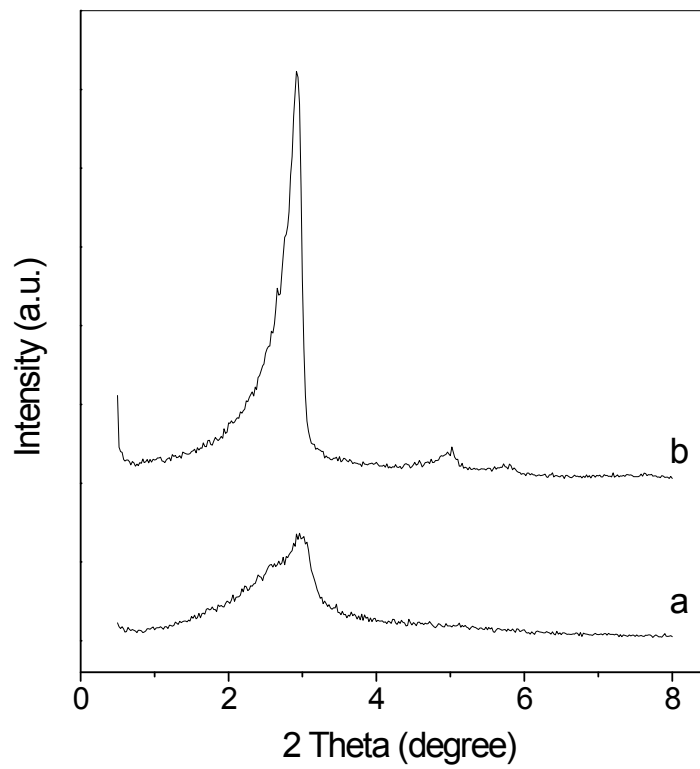

**Figure S2** XRD patterns of as-made (a) C<sub>16</sub>-ALSBA-1(56) and (b) C<sub>12</sub>-AS-50-HNO<sub>3</sub>.

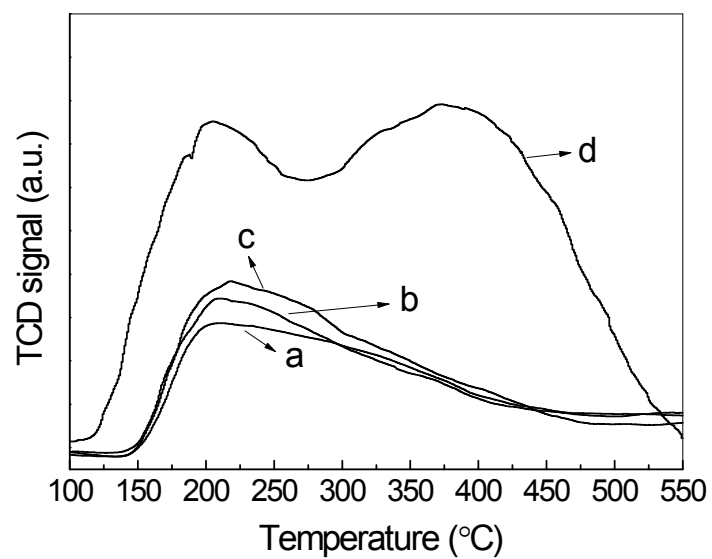

**Figure S3** NH<sub>3</sub>-TPD profiles of different catalysts: (a) C<sub>16</sub>-AISBA-1(56), (b) C<sub>12</sub>-AS-50, (c) C<sub>12</sub>-AS-50-HNO<sub>3</sub> and (d) USY-1.
